# Supplementary material for: Substantial loss of T cells upon lymphocyte isolation from heparin-anticoagulated peripheral blood
Source: Front Immunol. 2025 Sep 2;16:1665686. doi: 10.3389/fimmu.2025.1665686 (PMC12436355; doi:10.3389/fimmu.2025.1665686)
Supplement: Supplementary file 2 [file Table1.xlsx]

## Sheet: main
sample.ID	age	sex	cohort	blood_volume(ml)	lymphocytes(%_parent)	singlets(%_parent)	lympho_singlet.count	B.cells(%_parent)	naive(%_parent)	IgMIgD_MBC(%_parent)	CSW(%_parent)	CD5neg(%_parent)	CD5pos(%_parent)	transitional(%_parent)	21lo.27neg(%_parent)	21lo.27pos(%_parent)	21.hi(%_parent)	T.cells(%_parent)	CD4(%_parent)	CD8(%_parent)	CD4.naive(%_parent)	CD4.CM(%_parent)	CD4.EM(%_parent)	CD4.TEMRA(%_parent)	CD8.naive(%_parent)	CD8.CM(%_parent)	CD8.EM(%_parent)	CD8.TEMRA(%_parent)	Tregs(%_parent)	Th1(%_parent)	Th2(%_parent)	Th17(%_parent)
001_Hep	26	m	Hep	19.5	19.93	91.01	37555000	9.67	64.41	17.58	10.38	80.15	9.56	6.96	2	3.49	92.31	57.74	61.12	34.93	63.39	29.57	3.35	0.05	85.8	1.63	7.9	1.27	3.71	13.66	1.63	11.49
001_EDTA	26	m	EDTA	21.5	14.57	92.5	43690000	8.15	66.48	16.77	9.3	84.08	7.82	4.51	1.16	3.34	94.06	60.06	61.86	34.42	52.21	33.71	8.78	0.09	77.57	2.41	7.79	4.81	3.57	23.37	1.67	13.12
002_Hep	35	m	Hep	20	19.03	94.2	30905000	11.83	64.5	17.61	8.36	79.91	8.54	3.99	2.24	5.4	90.9	62.4	65.11	24.73	72.8	21.23	2.63	0.06	45.99	3.56	8.55	30.21	5.6	12.3	1.44	5.72
002_EDTA	35	m	EDTA	20.5	11.33	91.98	38445000	10.15	70.46	14.91	7.1	82.96	6.86	6.23	1.57	5.54	86.76	66	65.13	25.62	59.67	26.65	7.52	0.01	39.06	6.42	15.56	23.62	4.79	22.89	0.96	9.03
003_Hep	41	f	Hep	19.5	13.83	88.55	17800000	3.99	41.48	17.04	26.08	73.51	10.68	7.6	2.23	6.98	88.83	45.2	66.37	26.63	70.96	22.08	1.49	0	74.94	4.4	3.41	7.82	6.67	13.04	3.14	8.01
003_EDTA	41	f	EDTA	21.5	8.26	86.84	28600000	2.89	42.06	7.14	40.74	82.26	11.7	2.34	1.9	5.45	89.57	53.38	64.49	26.59	57.37	28.26	5.07	0.02	59.06	8.35	13.31	8.55	5.16	5.86	2.33	10.62
004_Hep	25	f	Hep	19	19.35	56.51	22400000	9.42	63.25	17.01	11.6	62.04	19.16	14	2.28	6.34	89.6	47	43.39	29.48	72.96	21.68	1.56	0.09	74.13	4.37	7.66	2.45	3.57	16.98	2.61	6.56
004_EDTA	25	f	EDTA	21	15.74	95.44	35300000	7.57	59.57	9.5	18.3	66.19	15.69	11.66	1.29	5.38	91.75	62.09	42.67	29.83	64.85	27.43	4.32	0.01	61.04	8.87	15.87	2.4	3.27	18.16	0.56	9.91
005_Hep	53	f	Hep	18	19.16	94.83	42000000	8.75	25.32	9.63	54.66	82.81	11.7	2.34	0.98	5.45	88.78	51.1	76.94	15.94	55.53	30.1	3.28	0.02	45.51	9.41	12.23	14.35	5.28	15.15	1.36	14.84
005_EDTA	53	f	EDTA	21	15.76	96.51	64700000	5.08	22.69	6.15	62.98	82.51	9.09	2.79	0.6	4.74	91.67	58.28	77.82	15.75	52.54	35.19	6.72	0.02	41.96	10.54	18.87	12.26	5.55	12.04	1.38	14.68
006_Hep	43	m	Hep	20	13.39	90.51	34500000	16.03	24.86	22.77	45.24	52.42	37.43	5.07	0.88	3.34	94.87	39.39	42.86	49.36	34.89	45.64	10.02	0.07	26.44	10.7	13.35	19.68	4.13	29.99	0.61	17.24
006_EDTA	43	m	EDTA	20.5	11.61	87.07	44150000	14.32	23.44	22.95	47.76	47.34	41.18	7.11	0.94	4.99	92.35	61.29	45.7	46.88	21.4	53.01	16.29	0.07	23.1	18.91	17.18	16.61	2.12	38.92	0.78	21.02
007_Hep	48	m	Hep	19	14.92	96.79	14385000	16.3	70.57	8.38	12.46	76.1	13.82	4.06	1.09	1.7	96.31	51	68.34	19.49	49.51	36.52	4.37	0.06	49.25	18.51	18.62	1.54	4.11	18.16	0.55	11.75
007_EDTA	48	m	EDTA	20.5	18.5	95.98	21095000	11.84	73.12	7.36	14.4	80.57	11.49	4	1.63	2.22	94.75	64.48	66.28	21.35	37.77	41.34	10.33	0.02	35.61	20.58	28.28	1.14	3.05	32.39	0.31	16.65
008_Hep	31	m	Hep	19.5	11.99	92.42	24755000	3.82	49.33	16.93	18.4	86.69	6.34	3.8	1.58	4.87	91.35	58.89	44.07	34.99	55.75	31.41	6.82	0.02	47.27	8.49	16.03	12.45	3.85	20.84	0.88	12.11
008_EDTA	31	m	EDTA	21	9.03	93.24	23510000	4.67	46.63	20.58	22.36	84.43	8.78	3.79	1.77	3.66	93.03	67.77	44.49	35.02	47.75	36.03	10.93	0.02	40.83	11.67	23.74	10.96	2.37	25.21	0.96	15.94
009_Hep	24	m	Hep	20	18.29	94.23	39590000	6.62	54.45	16.2	10.36	64.98	22.78	4	1.63	1.95	94.6	56.84	59.97	31.51	70.24	21.92	3.81	0.15	71.01	2.94	5.05	10.24	2.76	15.62	0.25	8.66
009_EDTA	24	m	EDTA	23	14.61	95.01	45270000	4.68	50.67	21.42	12.26	72.28	17.08	5.99	0.68	1.56	96.33	61.41	60.45	30.56	62.54	26.48	6.66	0.03	58.83	5.23	12.37	8.04	2.65	15.55	0.45	11.09
011_Hep	23	m	Hep	21.5	26.48	92.2	37870000	10.92	70.78	11.5	11.36	50.43	27.41	12.5	2.41	1.65	89.85	54.73	50.84	45.95	67.51	20.44	3.66	0.09	51.9	3.02	6.21	12.97	4.33	10.91	0.92	7.89
011_EDTA	23	m	EDTA	21	17.37	94.27	42640000	12.92	72.34	12.45	7.59	64.55	15.49	8.96	1.62	0.86	95.61	59.76	55.65	40.84	58.39	29.18	7.77	0.3	51.55	4.74	5.55	17.52	3.85	21.77	0.85	10.87
012_Hep	47	m	Hep	22.5	14.85	96.17	34035000	6.14	62.64	18.11	9.36	73.48	10.07	8	2.08	4.97	89.05	44.25	58.6	35.36	79.7	10.1	0.83	1.83	48.11	1.09	0.15	28.75	4.44	16.42	1.13	12.44
012_EDTA	47	m	EDTA	21	13.26	95.74	41220000	6.83	57.06	21.3	16.66	74.04	8.5	6.79	0.55	3.55	94.33	55.24	64.75	30.55	74.12	14.17	2.19	2.15	48.36	1.66	0.47	26.83	5.33	20.45	1.38	15.06
013_Hep	37	m	Hep	24	23.56	92.78	35875000	9.89	44.93	26.1	14.98	68.8	20.32	3.19	1.85	7.41	88.54	58.77	73.15	19.49	64.12	29.19	2.65	0.05	52.7	7.16	6.2	11.66	3.37	10.79	0.43	14.46
013_EDTA	37	m	EDTA	21.5	21.03	88.64	33805000	8.05	48.57	23.94	19.57	68.33	21.6	2.91	1.51	5.06	90.32	64.43	71.37	20.13	51.3	33.64	4.75	0.02	41.4	8.48	11.08	9.29	3.57	20.75	0.58	15.12
014_Hep	61	m	Hep	20	21.22	84.07	21155000	10.57	70.72	16.14	5.04	66.94	16.69	5.79	4.11	2.71	90.14	47.93	77.09	16.19	60.68	31.88	3.1	0.01	47.33	13.09	18.17	4.05	4.56	14.13	0.81	9.99
014_EDTA	61	m	EDTA	20.5	13.94	92.03	27925000	10.29	62.31	21.7	5.93	64.76	15.93	3.6	2.65	3.36	92.33	50.74	78.5	15.32	61.31	32.5	3.18	0	47.07	11.36	21.46	5.01	4.88	15.22	0.86	11.17
015_Hep	29	m	Hep	23	15.82	94.63	49610000	17.55	63.99	13.07	9.38	53.54	30.2	4.53	1.06	3.54	94.1	47.88	67.6	21.87	55.88	33.71	3.95	0.05	63.19	6.35	11.96	1.98	6.32	20.32	0.96	9.81
015_EDTA	29	m	EDTA	21	13.57	97.6	52810000	15.58	58.34	16.81	13.53	56.45	26.8	4.96	0.89	3.87	95.13	56.68	62.8	25.87	46.92	38.81	8.43	0.04	49.85	9.98	23.56	2.67	5.35	16.67	0.23	13.17
016_Hep	61	m	Hep	23	21.07	87.8	30830000	7.89	75.8	9.88	5.5	67.89	13.36	6	1.35	1.02	94.44	61.98	57.98	26.98	57.29	35.28	2.25	0.05	24.77	8.93	3.44	33.05	3.53	17.49	0.51	8.56
016_EDTA	61	m	EDTA	19	16.18	87.86	36625000	7.21	77.06	9.5	3.72	68.84	12.4	8.64	0.7	0.59	96.51	70.3	55.69	28.36	50.3	35.33	5.24	0.09	29.13	7.57	5.41	35.6	2.15	24.01	0.62	11.64

## Sheet: washsteps
sample.ID	age	sex	washstep	ml.blood	ml.sample	lympho_singlet.count	lymphocytes(%_parent)	singlets(%_parent)	non.T(%_parent)	B.cells(%_parent)	T.cells(%_parent)	CD4(%_parent)	CD8(%_parent)	CD4.naive(%_parent)	CD4.CM(%_parent)	CD4.EM(%_parent)	CD4.TEMRA(%_parent)	CD8.naive(%_parent)	CD8.CM(%_parent)	CD8.EM(%_parent)	CD8.TEMRA(%_parent)	Tregs(%_parent)	Th1(%_parent)	Th2(%_parent)	Th17(%_parent)
002_W1	35	m	0	24.5	24.5	13590000	17.95	82.02	36.7	26.84	62.47	70.8	21.82	68.93	23.22	2.42	0.05	46.2	2.84	7.83	34.95	4.57	7	0.82	6.65
002_W2	35	m	1	24.5	10	2270000	13.99	75.07	33.84	24.17	65.33	68.4	23.83	56.44	26.67	8.3	0.06	40.05	5.42	18.74	25.86	4.47	11.85	1.41	10.92
002_W3	35	m	2	24.5	10	230000	25.6	45.44	44.5	17.35	54.65	68.6	23.62	54.6	27.09	10.95	0.1	35.72	5.96	22.26	24.91	4.91	10.92	1.24	14.09
002_W4	35	m	3	24.5	10	80000	19.53	52.23	48.74	16.2	50.06	68.36	23.39	50.85	26.72	13.55	0.26	38.72	5.73	27.44	16.39	4.16	14.4	0.52	15.85
003_W1	42	f	0	22	22	2710000	1.28	86.3	42.53	22.35	55.07	71.58	20.75	48.79	44.48	2.36	0.01	69.23	9.96	5.44	9.23	2.44	8.27	0.99	4.73
003_W2	42	f	1	22	10	1670000	34.54	65.82	35.15	13.69	63.89	65.68	27.88	53.81	34.9	5.27	0.02	55.8	9.59	13.42	10.48	3.48	10.49	0.42	7.22
003_W3	42	f	2	22	10	828000	17.27	73.52	35.35	19.14	63.01	65.91	26.98	49.37	33.23	9.38	0.03	52.28	9.14	17.2	9.41	4.05	19.61	0.44	8.3
003_W4	42	f	3	22	10	107000	8.63	73.91	39.61	26.01	58.43	67.02	25.35	42.19	39.18	9.46	0.07	50.3	9.95	18.52	7.82	3.64	34.03	0.16	5.32
020_W1	24	f	0	23	23	18460000	8.7	87.06	34.67	28.45	64.4	61.64	32.85	42.2	39.88	4.23	0.04	83.16	5.51	5.97	1.34	2.51	12.13	0.53	6.93
020_W2	24	f	1	23	10	3220000	16.41	67.23	33.75	20.33	65.2	59.73	33.01	31.11	44.18	9.63	0.04	68.29	9.02	13.96	1.37	1.69	21.63	0.49	9.85
020_W3	24	f	2	23	10	541000	21.56	69.49	37.89	18.58	60.43	57.12	33.94	35.51	33.95	15.24	0.05	64.94	7.74	17.28	1.55	2.37	19.09	0.57	12.21
020_W4	24	f	3	23	10	77000	14.54	69.32	47.98	24.4	50.24	57.25	33.29	28.41	38.5	15.12	0.01	64.82	8.36	17.65	1.14	2.55	18.4	0.13	10.85

## Sheet: erylysis
sample.ID	proband	anticoagulant	isolation.step	age	sex	cohort	blood_volume(ml)	lymphocytes(%_parent)	singlets(%_parent)	lympho_singlet.count	B.cells(%_parent)	naive(%_parent)	IgMIgD_MBC(%_parent)	CSW(%_parent)	CD5neg(%_parent)	CD5pos(%_parent)	transitional(%_parent)	21lo.27neg(%_parent)	21lo.27pos(%_parent)	21.hi(%_parent)	T.cells(%_parent)	CD4(%_parent)	CD8(%_parent)	CD4.naive(%_parent)	CD4.CM(%_parent)	CD4.EM(%_parent)	CD4.TEMRA(%_parent)	CD8.naive(%_parent)	CD8.CM(%_parent)	CD8.EM(%_parent)	CD8.TEMRA(%_parent)	Tregs(%_parent)	Th1(%_parent)	Th2(%_parent)	Th17(%_parent)
005__full_lysis_Hep	005	Hep	full	53	f	Hep	19.5	19.93	91.01	37555000	9.67	64.41	17.58	10.38	80.15	9.56	6.96	2	3.49	92.31	57.74	61.12	34.93	63.39	29.57	3.35	0.05	85.8	1.63	7.9	1.27	3.71	13.66	1.63	11.49
005_full_lysis_EDTA	005	EDTA	full	53	f	EDTA	21.5	14.57	92.5	43690000	8.15	66.48	16.77	9.3	84.08	7.82	4.51	1.16	3.34	94.06	60.06	61.86	34.42	52.21	33.71	8.78	0.09	77.57	2.41	7.79	4.81	3.57	23.37	1.67	13.12
005_ficoll_Hep	005	Hep	ficoll	53	f	Hep	20	19.03	94.2	30905000	11.83	64.5	17.61	8.36	79.91	8.54	3.99	2.24	5.4	90.9	62.4	65.11	24.73	72.8	21.23	2.63	0.06	45.99	3.56	8.55	30.21	5.6	12.3	1.44	5.72
005_ficoll_EDTA	005	EDTA	ficoll	53	f	EDTA	20.5	11.33	91.98	38445000	10.15	70.46	14.91	7.1	82.96	6.86	6.23	1.57	5.54	86.76	66	65.13	25.62	59.67	26.65	7.52	0.01	39.06	6.42	15.56	23.62	4.79	22.89	0.96	9.03
005_pellet_Hep	005	Hep	pellet	53	f	Hep	19.5	13.83	88.55	17800000	3.99	41.48	17.04	26.08	73.51	10.68	7.6	2.23	6.98	88.83	45.2	66.37	26.63	70.96	22.08	1.49	0	74.94	4.4	3.41	7.82	6.67	13.04	3.14	8.01
005_pellet_EDTA	005	EDTA	pellet	53	f	EDTA	21.5	8.26	86.84	28600000	2.89	42.06	7.14	40.74	82.26	11.7	2.34	1.9	5.45	89.57	53.38	64.49	26.59	57.37	28.26	5.07	0.02	59.06	8.35	13.31	8.55	5.16	5.86	2.33	10.62
003_full_lysis_Hep	003	Hep	full	42	f	Hep	19	19.35	56.51	22400000	9.42	63.25	17.01	11.6	62.04	19.16	14	2.28	6.34	89.6	47	43.39	29.48	72.96	21.68	1.56	0.09	74.13	4.37	7.66	2.45	3.57	16.98	2.61	6.56
003_full_lysis_EDTA	003	EDTA	full	42	f	EDTA	21	15.74	95.44	35300000	7.57	59.57	9.5	18.3	66.19	15.69	11.66	1.29	5.38	91.75	62.09	42.67	29.83	64.85	27.43	4.32	0.01	61.04	8.87	15.87	2.4	3.27	18.16	0.56	9.91
003_ficoll_Hep	003	Hep	ficoll	42	f	Hep	18	19.16	94.83	42000000	8.75	25.32	9.63	54.66	82.81	11.7	2.34	0.98	5.45	88.78	51.1	76.94	15.94	55.53	30.1	3.28	0.02	45.51	9.41	12.23	14.35	5.28	15.15	1.36	14.84
003_ficoll_EDTA	003	EDTA	ficoll	42	f	EDTA	21	15.76	96.51	64700000	5.08	22.69	6.15	62.98	82.51	9.09	2.79	0.6	4.74	91.67	58.28	77.82	15.75	52.54	35.19	6.72	0.02	41.96	10.54	18.87	12.26	5.55	12.04	1.38	14.68
003_pellet_Hep	003	Hep	pellet	42	f	Hep	20	13.39	90.51	34500000	16.03	24.86	22.77	45.24	52.42	37.43	5.07	0.88	3.34	94.87	39.39	42.86	49.36	34.89	45.64	10.02	0.07	26.44	10.7	13.35	19.68	4.13	29.99	0.61	17.24
003_pellet_EDTA	003	EDTA	pellet	42	f	EDTA	20.5	11.61	87.07	44150000	14.32	23.44	22.95	47.76	47.34	41.18	7.11	0.94	4.99	92.35	61.29	45.7	46.88	21.4	53.01	16.29	0.07	23.1	18.91	17.18	16.61	2.12	38.92	0.78	21.02
021_full_lysis_Hep	021	Hep	full	29	f	Hep	19	14.92	96.79	14385000	16.3	70.57	8.38	12.46	76.1	13.82	4.06	1.09	1.7	96.31	51	68.34	19.49	49.51	36.52	4.37	0.06	49.25	18.51	18.62	1.54	4.11	18.16	0.55	11.75
021_full_lysis_EDTA	021	EDTA	full	29	f	EDTA	20.5	18.5	95.98	21095000	11.84	73.12	7.36	14.4	80.57	11.49	4	1.63	2.22	94.75	64.48	66.28	21.35	37.77	41.34	10.33	0.02	35.61	20.58	28.28	1.14	3.05	32.39	0.31	16.65
021_ficoll_Hep	021	Hep	ficoll	29	f	Hep	19.5	11.99	92.42	24755000	3.82	49.33	16.93	18.4	86.69	6.34	3.8	1.58	4.87	91.35	58.89	44.07	34.99	55.75	31.41	6.82	0.02	47.27	8.49	16.03	12.45	3.85	20.84	0.88	12.11
021_ficoll_EDTA	021	EDTA	ficoll	29	f	EDTA	21	9.03	93.24	23510000	4.67	46.63	20.58	22.36	84.43	8.78	3.79	1.77	3.66	93.03	67.77	44.49	35.02	47.75	36.03	10.93	0.02	40.83	11.67	23.74	10.96	2.37	25.21	0.96	15.94
021_pellet_Hep	021	Hep	pellet	29	f	Hep	20	18.29	94.23	39590000	6.62	54.45	16.2	10.36	64.98	22.78	4	1.63	1.95	94.6	56.84	59.97	31.51	70.24	21.92	3.81	0.15	71.01	2.94	5.05	10.24	2.76	15.62	0.25	8.66
021_pellet_EDTA	021	EDTA	pellet	29	f	EDTA	23	14.61	95.01	45270000	4.68	50.67	21.42	12.26	72.28	17.08	5.99	0.68	1.56	96.33	61.41	60.45	30.56	62.54	26.48	6.66	0.03	58.83	5.23	12.37	8.04	2.65	15.55	0.45	11.09
001_full_lysis_Hep	001	Hep	full	27	m	Hep	21.5	26.48	92.2	37870000	10.92	70.78	11.5	11.36	50.43	27.41	12.5	2.41	1.65	89.85	54.73	50.84	45.95	67.51	20.44	3.66	0.09	51.9	3.02	6.21	12.97	4.33	10.91	0.92	7.89
001_full_lysis_EDTA	001	EDTA	full	27	m	EDTA	21	17.37	94.27	42640000	12.92	72.34	12.45	7.59	64.55	15.49	8.96	1.62	0.86	95.61	59.76	55.65	40.84	58.39	29.18	7.77	0.3	51.55	4.74	5.55	17.52	3.85	21.77	0.85	10.87
001_ficoll_Hep	001	Hep	ficoll	27	m	Hep	22.5	14.85	96.17	34035000	6.14	62.64	18.11	9.36	73.48	10.07	8	2.08	4.97	89.05	44.25	58.6	35.36	79.7	10.1	0.83	1.83	48.11	1.09	0.15	28.75	4.44	16.42	1.13	12.44
001_ficoll_EDTA	001	EDTA	ficoll	27	m	EDTA	21	13.26	95.74	41220000	6.83	57.06	21.3	16.66	74.04	8.5	6.79	0.55	3.55	94.33	55.24	64.75	30.55	74.12	14.17	2.19	2.15	48.36	1.66	0.47	26.83	5.33	20.45	1.38	15.06
001_pellet_Hep	001	Hep	pellet	27	m	Hep	24	23.56	92.78	35875000	9.89	44.93	26.1	14.98	68.8	20.32	3.19	1.85	7.41	88.54	58.77	73.15	19.49	64.12	29.19	2.65	0.05	52.7	7.16	6.2	11.66	3.37	10.79	0.43	14.46
001_pellet_EDTA	001	EDTA	pellet	27	m	EDTA	21.5	21.03	88.64	33805000	8.05	48.57	23.94	19.57	68.33	21.6	2.91	1.51	5.06	90.32	64.43	71.37	20.13	51.3	33.64	4.75	0.02	41.4	8.48	11.08	9.29	3.57	20.75	0.58	15.12
002_full_lysis_Hep	002	Hep	full	35	m	Hep	20	21.22	84.07	21155000	10.57	70.72	16.14	5.04	66.94	16.69	5.79	4.11	2.71	90.14	47.93	77.09	16.19	60.68	31.88	3.1	0.01	47.33	13.09	18.17	4.05	4.56	14.13	0.81	9.99
002_full_lysis_EDTA	002	EDTA	full	35	m	EDTA	20.5	13.94	92.03	27925000	10.29	62.31	21.7	5.93	64.76	15.93	3.6	2.65	3.36	92.33	50.74	78.5	15.32	61.31	32.5	3.18	0	47.07	11.36	21.46	5.01	4.88	15.22	0.86	11.17
002_ficoll_Hep	002	Hep	ficoll	35	m	Hep	23	15.82	94.63	49610000	17.55	63.99	13.07	9.38	53.54	30.2	4.53	1.06	3.54	94.1	47.88	67.6	21.87	55.88	33.71	3.95	0.05	63.19	6.35	11.96	1.98	6.32	20.32	0.96	9.81
002_ficoll_EDTA	002	EDTA	ficoll	35	m	EDTA	21	13.57	97.6	52810000	15.58	58.34	16.81	13.53	56.45	26.8	4.96	0.89	3.87	95.13	56.68	62.8	25.87	46.92	38.81	8.43	0.04	49.85	9.98	23.56	2.67	5.35	16.67	0.23	13.17
002_pellet_Hep	002	Hep	pellet	35	m	Hep	23	21.07	87.8	30830000	7.89	75.8	9.88	5.5	67.89	13.36	6	1.35	1.02	94.44	61.98	57.98	26.98	57.29	35.28	2.25	0.05	24.77	8.93	3.44	33.05	3.53	17.49	0.51	8.56
002_pellet_EDTA	002	EDTA	pellet	35	m	EDTA	19	16.18	87.86	36625000	7.21	77.06	9.5	3.72	68.84	12.4	8.64	0.7	0.59	96.51	70.3	55.69	28.36	50.3	35.33	5.24	0.09	29.13	7.57	5.41	35.6	2.15	24.01	0.62	11.64

## Sheet: centrifugation_length
proband_id	anticoagulant	DGC_time_minutes	ml_blood	total_lymphocytes	lymphos_per_ml	lymphocytes	singlets	non.T	T.cells	CD4	CD8	CD4.naive	CD4.CM	CD4.EM	CD4.TEMRA	CD8.naive	CD8.CM	CD8.EM	CD8.TEMRA	Tregs
ctrl_time_001	heparin	35	23	35900000	1.56087e+06	17.92	91.87	36.27	63.67	81.65	13.51	61.43	30.97	4.28	0.04	42.26	9.94	8.04	11.58	4.51
ctrl_time_001	heparin	60	22.5	41100000	1.82667e+06	18.83	94.43	32.02	67.94	83.13	12.78	65.31	28.25	3.47	0.01	45.83	6.32	5.18	18.79	3.88
ctrl_time_001	EDTA	35	21.5	49650000	2.3093e+06	17.47	93.37	36.81	63.14	82.15	12.66	47.71	38.9	8.47	0.03	37.13	10.8	12.68	12.94	4.43
ctrl_time_001	EDTA	60	19.5	48500000	2.48718e+06	19.26	93.39	33.89	65.94	82.14	13.29	49.44	38.13	7.83	0.02	41.58	9.49	8.35	14.4	3.67
ctrl_time_002	heparin	35	22.5	34750000	1.54444e+06	24.57	94.09	43.93	55.99	53.52	39.31	21.86	58.14	13.4	0.06	23.63	13.14	14.29	13.98	3.72
ctrl_time_002	heparin	60	21	35800000	1.70476e+06	20.67	95.43	40.39	59.54	51.84	42.4	23.17	55.95	13.59	0.1	25.82	10.99	9.97	19.2	3.58
ctrl_time_002	EDTA	35	18.5	38900000	2.1027e+06	17.68	93.08	39.06	60.87	54.54	38.03	18.03	55.49	18.95	0.04	20.47	16.19	20.19	16.03	3.16
ctrl_time_002	EDTA	60	18	37250000	2.06944e+06	11.11	92.84	37.73	62.25	49.9	43.9	18.23	54.5	19.51	0.04	23.57	12.13	13.48	17.6	2.9
ctrl_time_003	heparin	35	23.5	36050000	1.53404e+06	34.57	94.56	34.76	64.92	65.49	27.92	62.67	32.28	2.48	0.02	67.57	14.65	6.81	3.58	2.23
ctrl_time_003	heparin	60	22	38100000	1.73182e+06	28.51	93.46	37.77	62.15	60.27	33.09	63.09	31.83	2.57	0.05	66.33	13.95	6.81	3.31	2.39
ctrl_time_003	EDTA	35	21	39350000	1.87381e+06	22.46	93.72	35.67	64.23	62.71	29.07	53.3	37.33	5.39	0.02	53.01	21.1	9.56	3.82	2.52
ctrl_time_003	EDTA	60	20	42650000	2132500	28.15	95.03	33.4	66.49	56.76	36.4	54.89	36.95	4.61	0.03	57.26	17.26	9.81	3.18	2.06
